# Supplementary material for: Antibody production and characterization of the nucleoprotein of sever fever with thrombocytopenia syndrome virus (SFTSV) for effective diagnosis of SFTSV
Source: Springer Nature journal article supplement (doi:10.1186/s12985-023-02173-1), 2023-09-07
Supplement: MOESM1 [file 26016052]

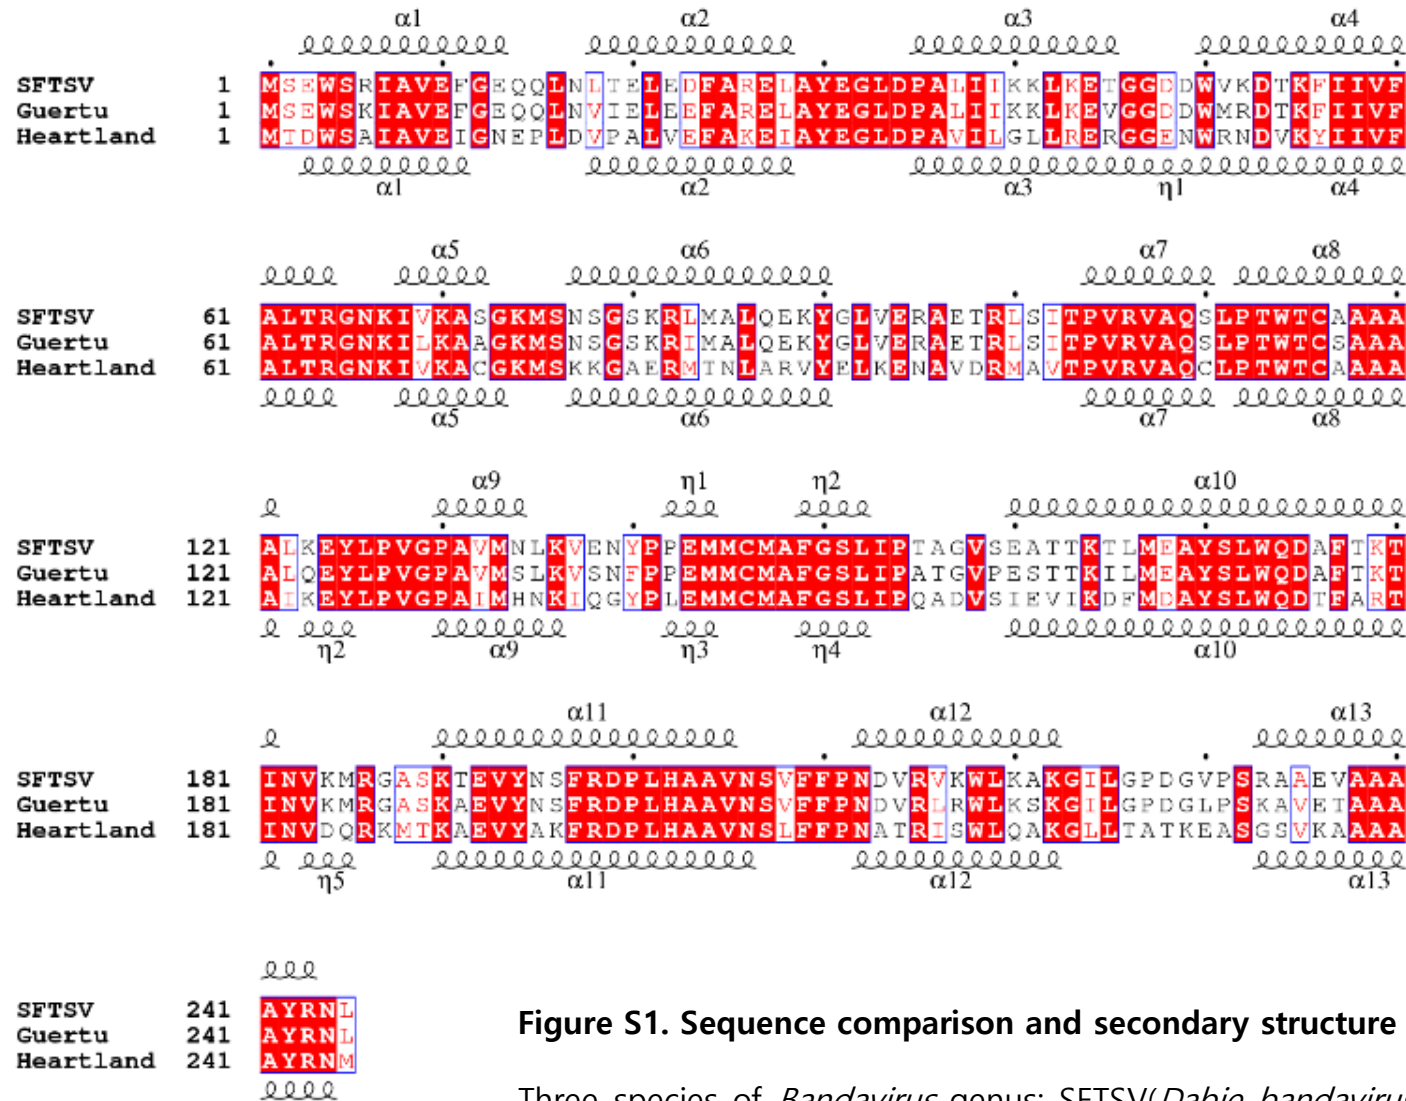

Figure S1. Sequence comparison and secondary structure information of *Bandavirus*.

Three species of *Bandavirus* genus; SFTSV(*Dabie bandavirus*), *Guertu bandavirus* and *Heartland bandavirus* were aligned and compared. Strictly conserved residues are boxed in white on a red background, and highly conserved residues are boxed in red on a white background. Every tenth residue is indicated with a dot. The secondary structure was work with a deposited SFTSV N structure in Protein Data Bank (PDB), and the  $\alpha$ -helix is depicted by a coil (top : pentamer SFTSV N with PDB ID 4J4U, bottom : hexameric SFTSV N with PDB ID 4J4R). The figure was generated by ESPript3 (esript.ibcp.fr)

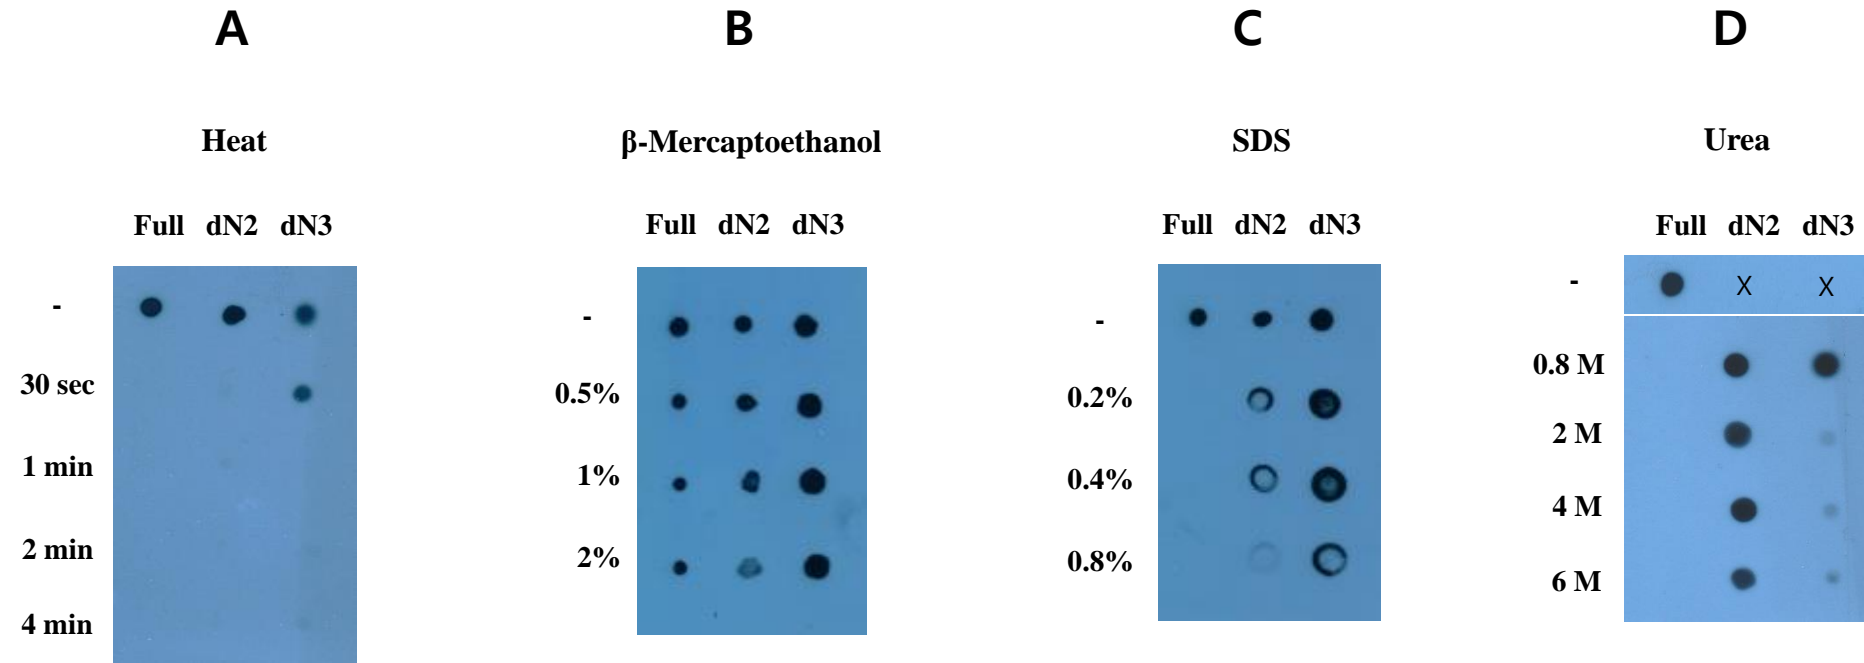

**Figure S2. Epitope denaturation test.**

Full-length and dN2 and dN3 of SFTSV N protein were tested with four denaturation factors; A: Urea, B: SDS, C:  $\beta$ -mercaptoethanol, D: Heat. SFTSV Ab clone #10 (B2H12) was used in Dot blot analysis. Under the urea and SDS conditions, the epitope of AB #10(B2H12) was denatured at full length, but it maintains the conformation at dN2 and dN3 (A,B).  $\beta$ -mercaptoethanol doesn't effect to the epitope at full length, as well as dN2 and dN3 (C). However, the epitope was denatured by heat treatment (D).

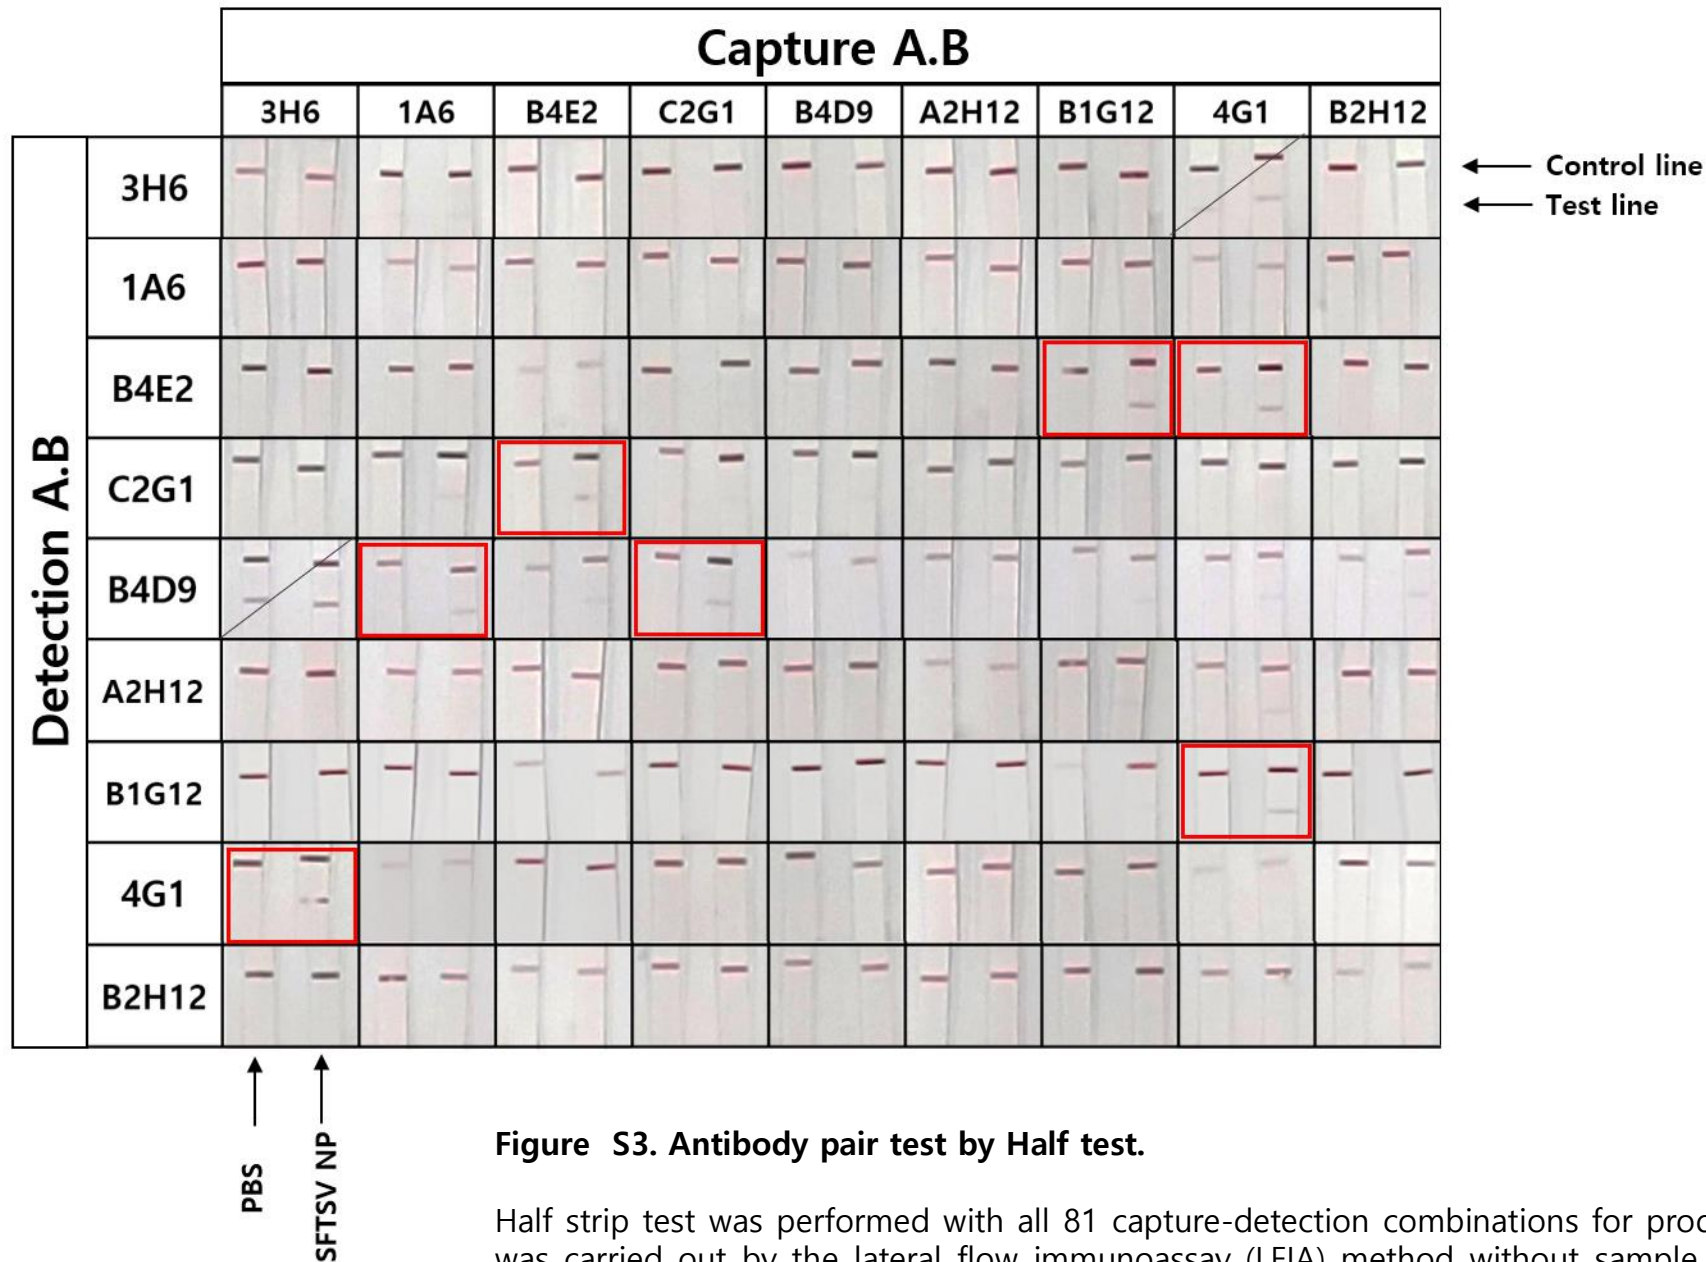

**Figure S3. Antibody pair test by Half test.**

Half strip test was performed with all 81 capture-detection combinations for produced 9 SFTSV N antibodies. It was carried out by the lateral flow immunoassay (LFIA) method without sample pad and conjugated pad. The test strip was coated with each of 9 SFTSV N antibodies as capture antibody, and dipped in the mixture of SFTSV N protein (100ng/ml) as antigen and each 9 antibodies as detection antibodies.
